# Supplementary material for: Developing a Parsimonious Canopy Model (PCM v1.0) to Predict Forest Gross Primary Productivity and Leaf Area Index
Source: Copernicus journal article supplement (doi:10.5194/gmd-2022-87), 2022-05-02
Supplement: Supplementary file 1 [file gmd-2022-87-supplement.zip]

Archive with 8 entries (8 files):
- Figure S1.pdf
- Figure S2.pdf
- Figure S3.pdf
- Figure S3.png
- Figure S4.pdf
- Figure S5.pdf
- Figure S6.pdf
- Supplementary figure captions.pdf
