# Supplementary figures and images for: Developing a Parsimonious Canopy Model (PCM v1.0) to Predict Forest Gross Primary Productivity and Leaf Area Index
Source: Copernicus journal article supplement (doi:10.5194/gmd-2022-87), 2022-05-02

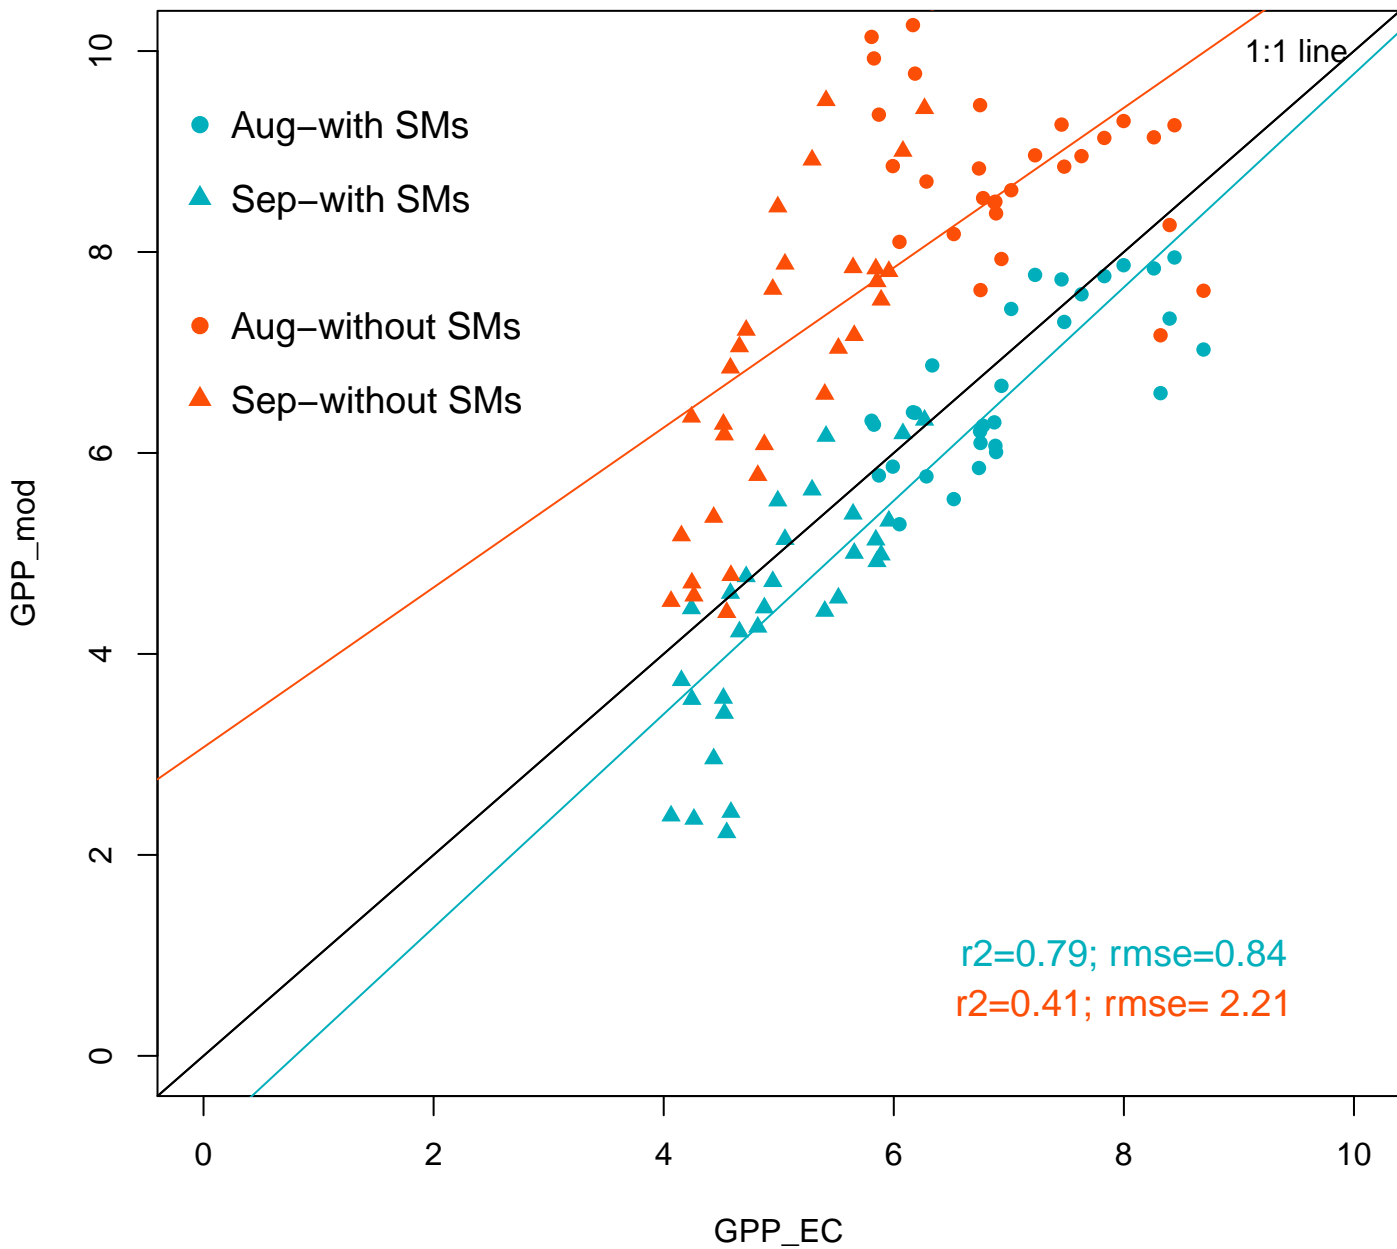

Supplement: Supplementary file 1 [file gmd-2022-87-supplement.zip › Figure S1.pdf]

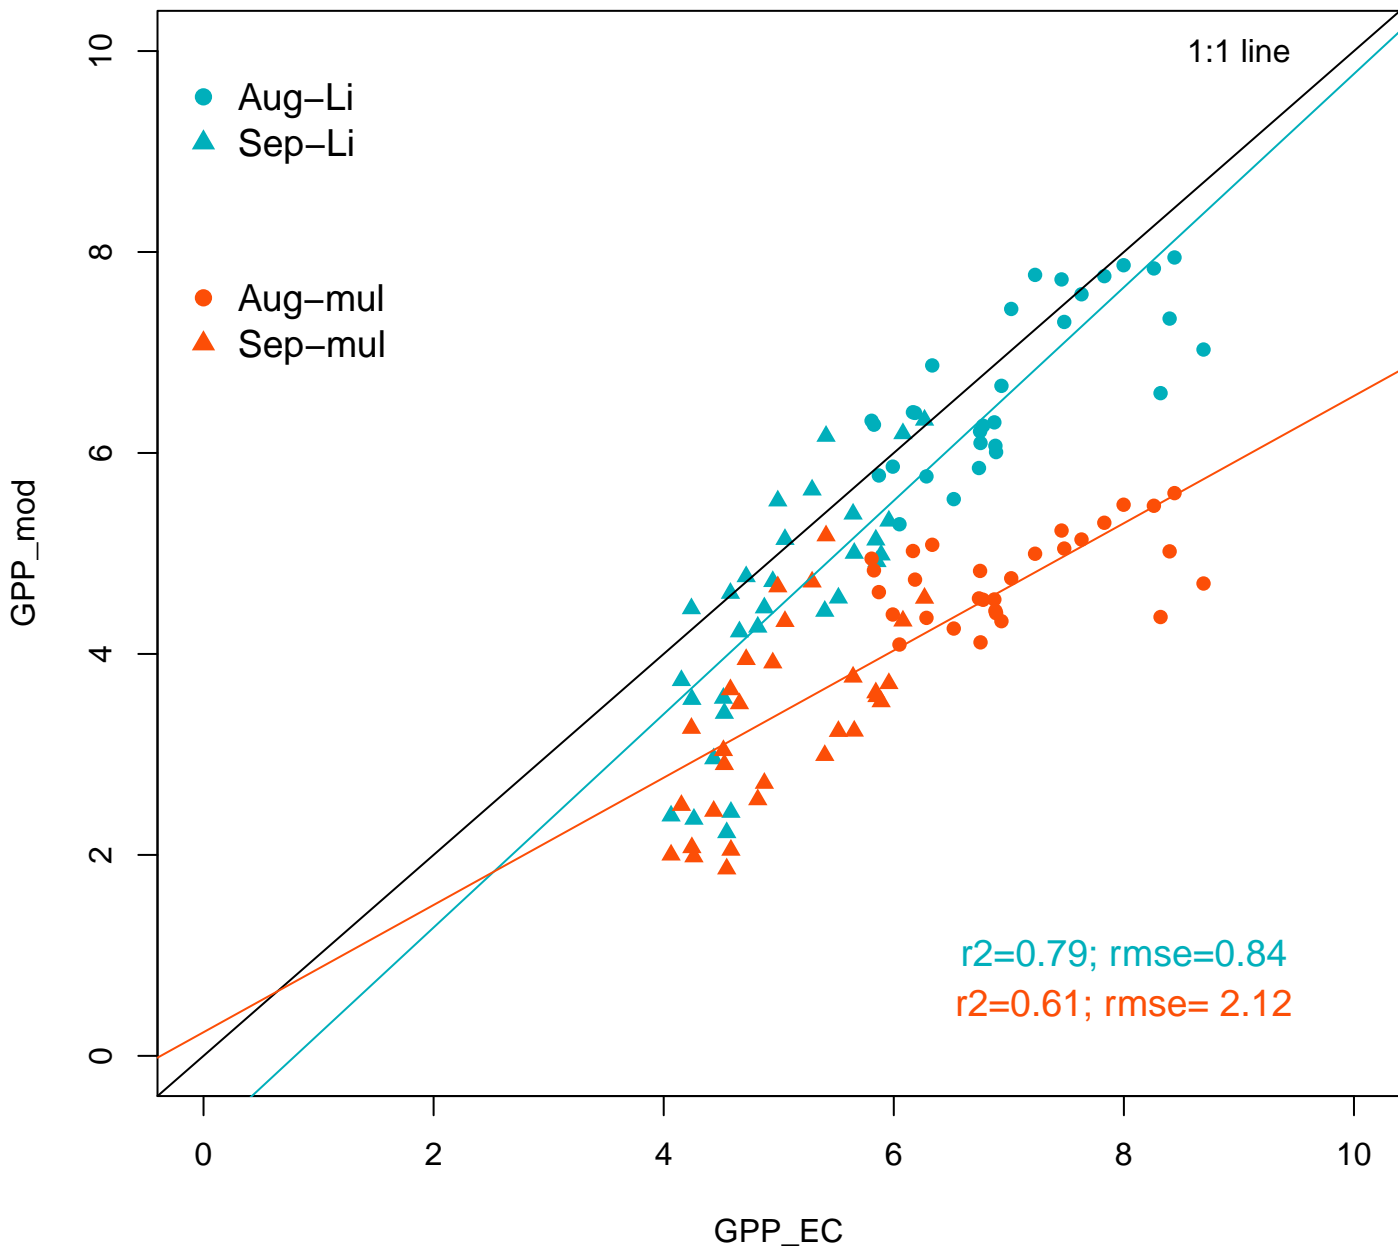

Supplement: Supplementary file 1 [file gmd-2022-87-supplement.zip › Figure S2.pdf]

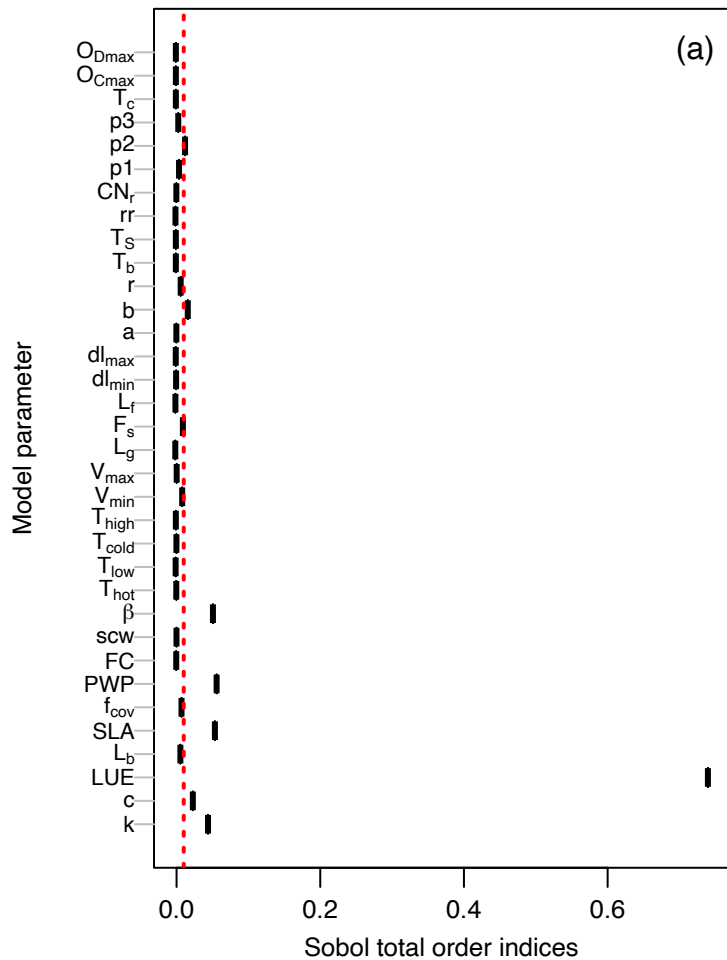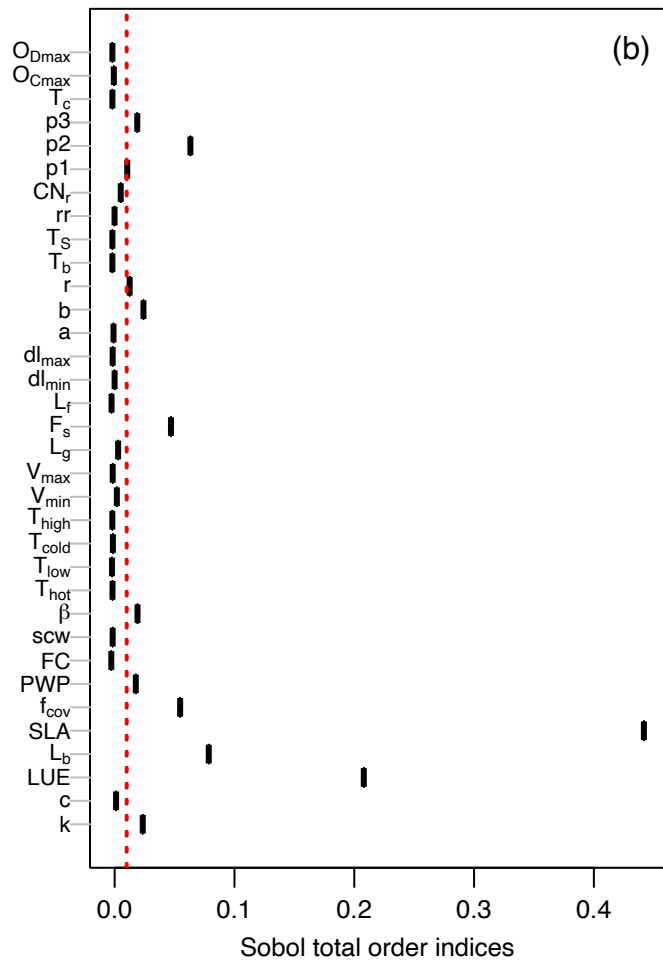

Supplement: Supplementary file 1 [file gmd-2022-87-supplement.zip › Figure S3.pdf]

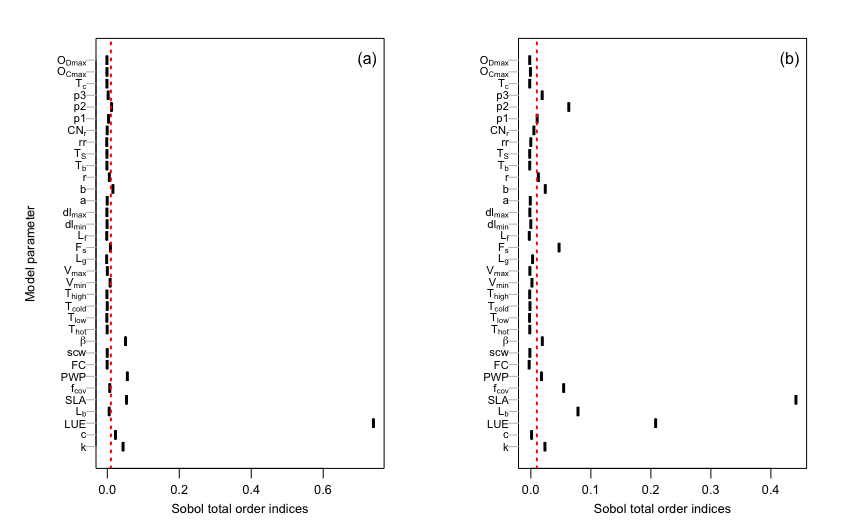

Supplement: Supplementary file 1 [file gmd-2022-87-supplement.zip › Figure S3.png]

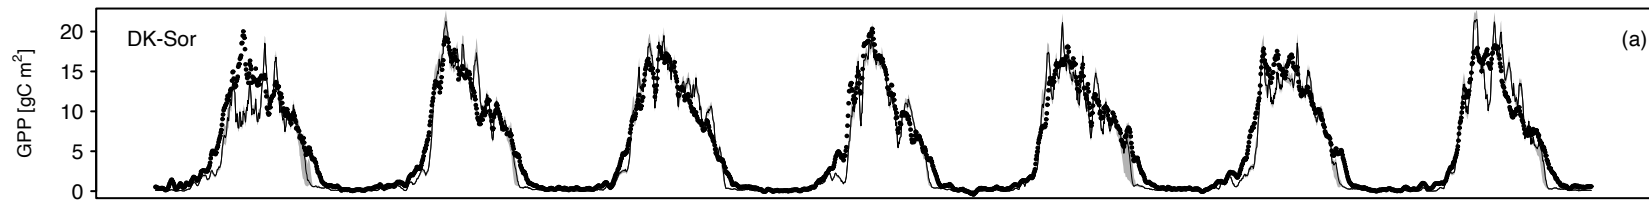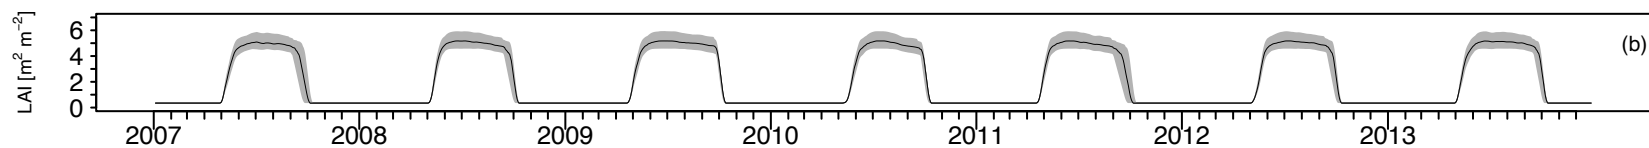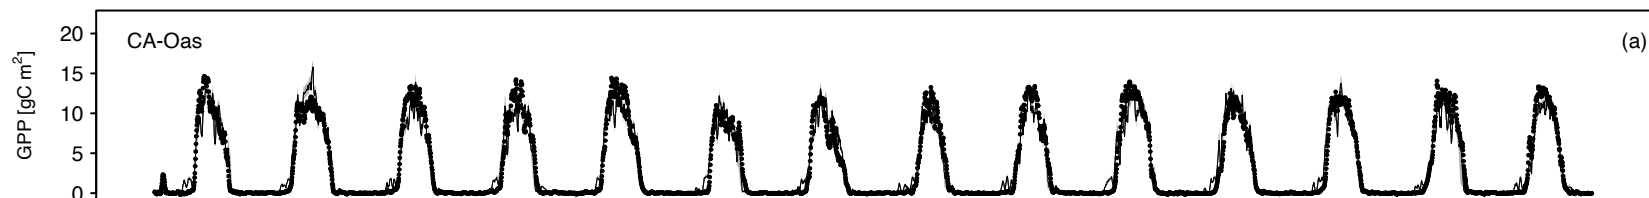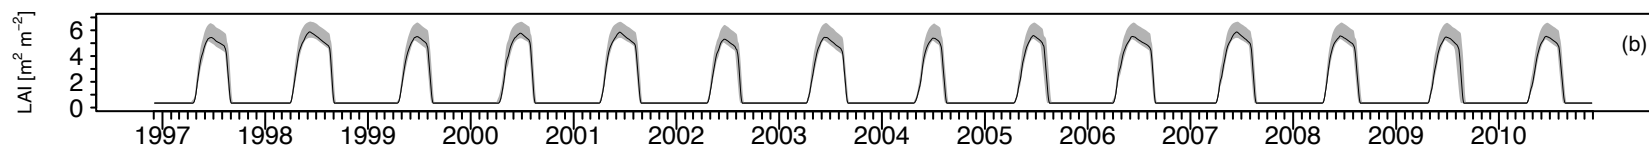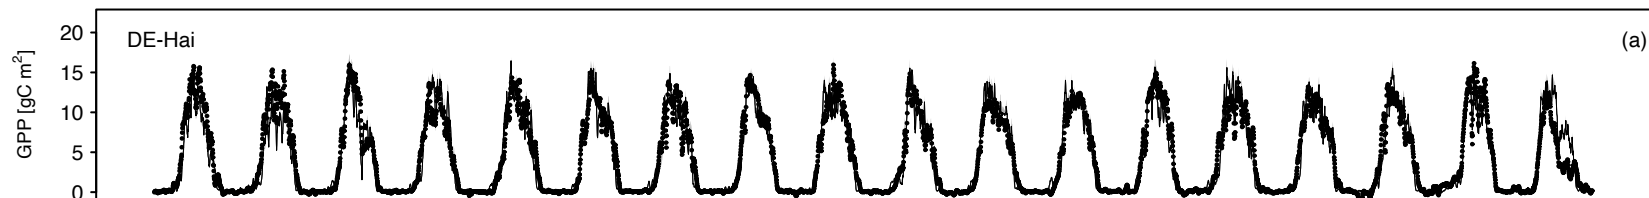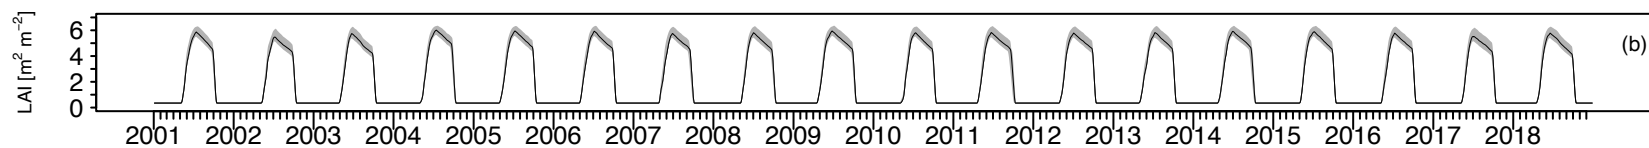

Supplement: Supplementary file 1 [file gmd-2022-87-supplement.zip › Figure S4.pdf]

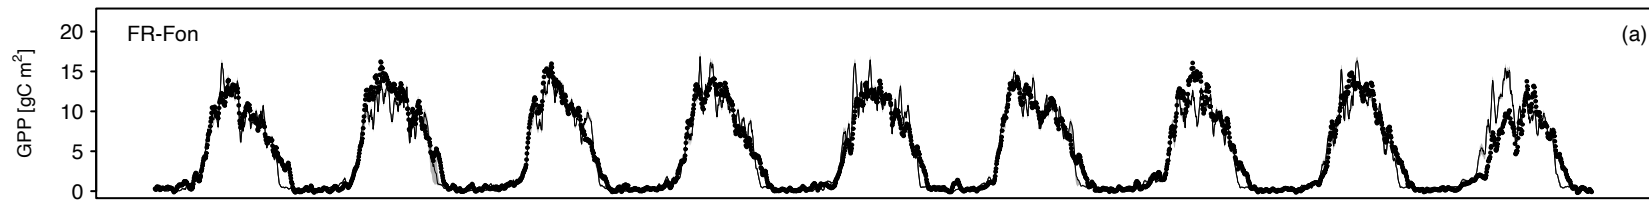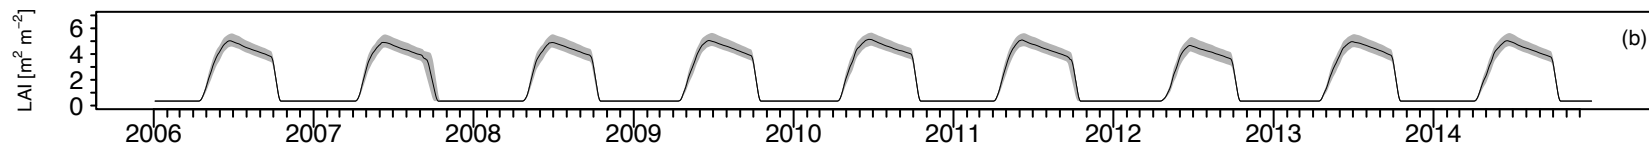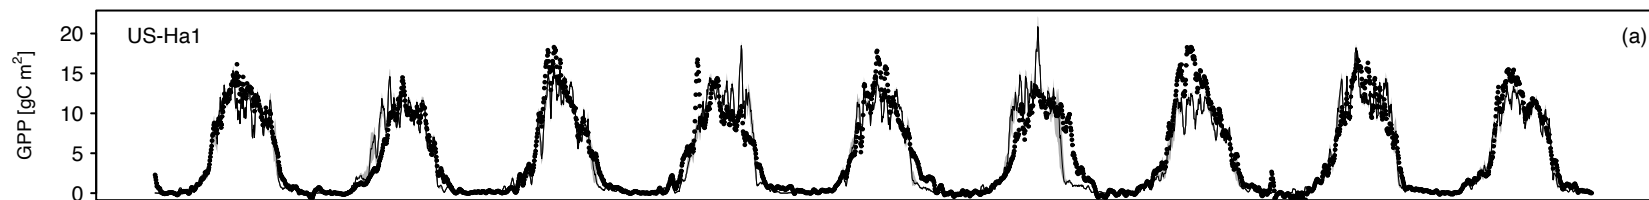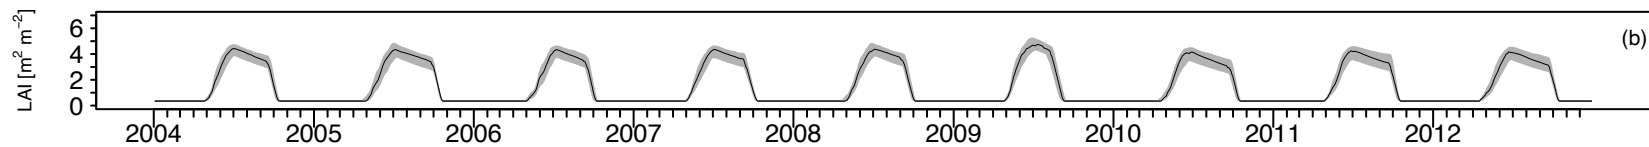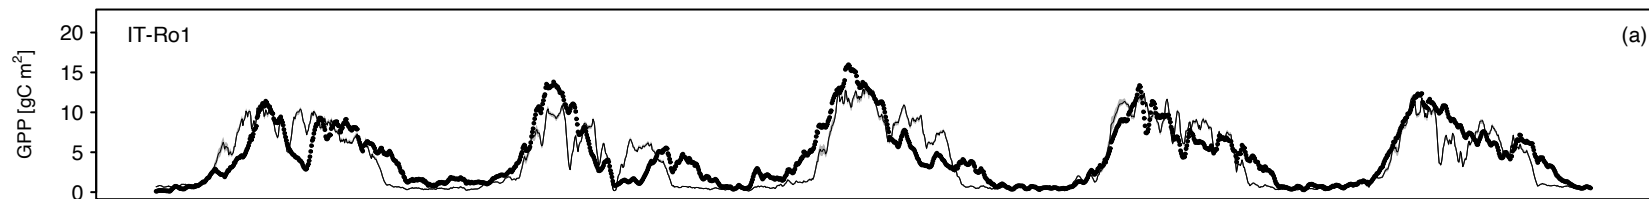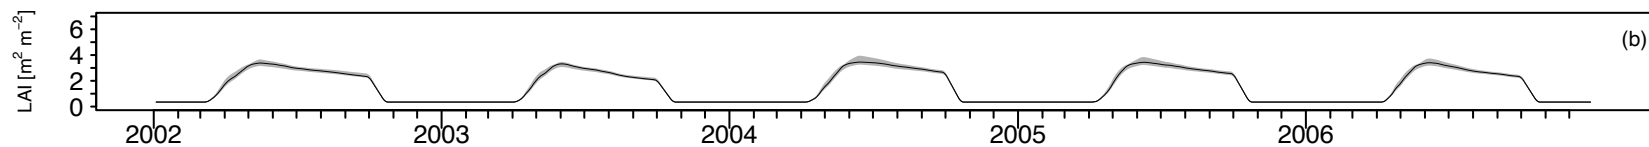

Supplement: Supplementary file 1 [file gmd-2022-87-supplement.zip › Figure S5.pdf]

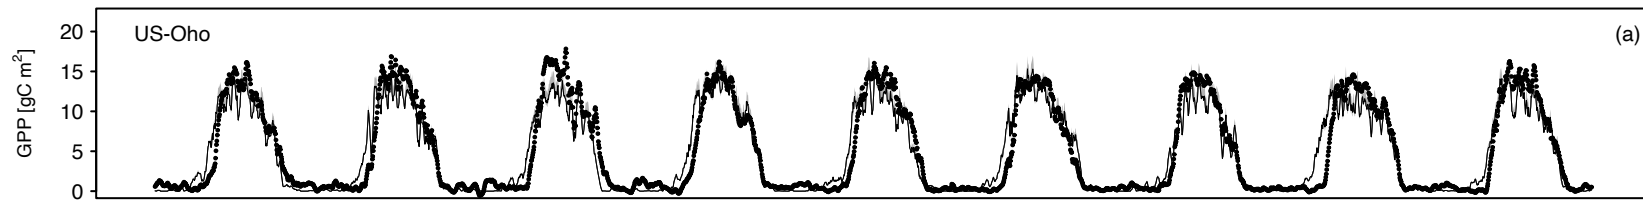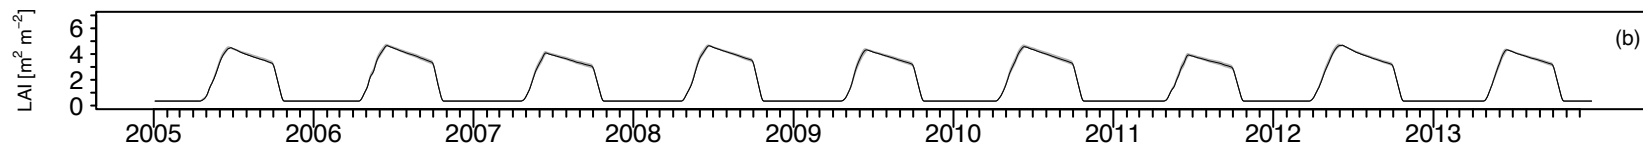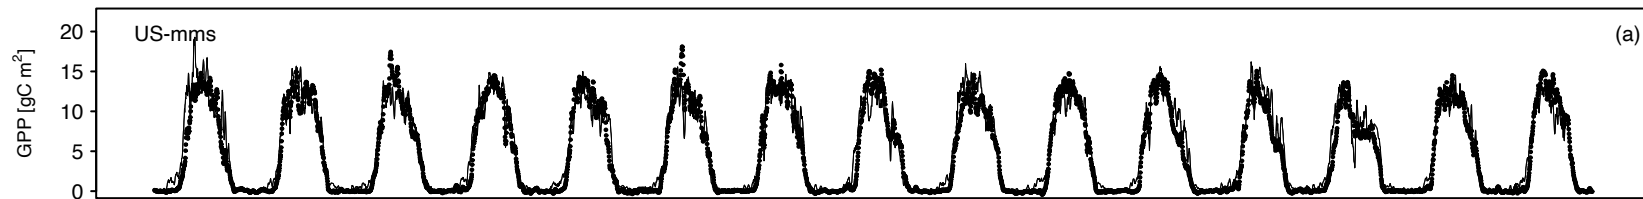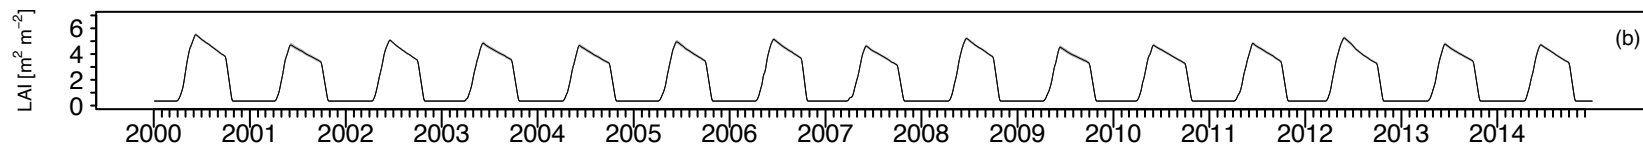

Supplement: Supplementary file 1 [file gmd-2022-87-supplement.zip › Figure S6.pdf]
